# **Plyometric training enhances strength and precision of the finger movements in pianists**

Kaito Muramatsu<sup>1</sup>, Takanori Oku<sup>1,2,3</sup>, Shinichi Furuya<sup>1,2,3</sup>

1 Sony Computer Science Laboratories, Inc., Tokyo, Japan

2 NeuroPiano Institute, Kyoto, Japan

3 Sophia University, Tokyo, Japan

## **Correspondence to:**

Dr. Shinichi Furuya, Ph.D

Sony Computer Science Laboratories, Inc.,

Takanawa Muse Bldg, 3-14-13, Higashigotanda, Sinagawa-ku, 141-0022, Japan

E-mail: [furuya@csl.sony.co.jp](mailto:furuya@csl.sony.co.jp)

Phone: +81 3 5448 4380

Fax: +81 3 5448 4273

## ABSTRACT

Stability of timing and force production in repetitive movements characterizes skillful motor behaviors such as surgery and playing musical instruments. However, even trained individuals such as musicians undergo further extensive training for the improvement of these skills. Previous studies that investigated the lower extremity movements such as jumping and sprinting demonstrated enhancement of the maximum force and rate of force development through the plyometric exercises. However, it remains unknown whether the plyometric exercises enhance the stability of timing and force production of the dexterous finger movements in trained individuals. Here we address this issue by examining the effects of plyometric-like training specialized for finger movements on piano performance by well-trained pianists. The training demonstrated a decrease of the variation in timing and velocity of successive keystrokes, along with a concomitant increase in the rate of force development of the four fingers, but not the thumb, although there was no change in the finger muscular activities. By contrast, such a training effect was not evident following a conventional repetitive piano practice. In addition, a significant increase in the forearm muscle temperature was observed specifically through performing the plyometric exercise with the fingers, implying its association with improved performance. These results indicate effectiveness of the plyometric exercises for improvement of strength, precision, and physiological efficiency of the finger movements even in expert pianists, which implicates a role of ways of practicing in enhancing experts' expertise.

## INTRODUCTION

Musical performance represents one of the most skillful motor behaviors, which typically requires years of extensive musical training from childhood<sup>1-3</sup>. Conventional musical education and training, however, may emphasize the importance of quantity of the practice<sup>4</sup> and subjective experience of trained teachers and performers, due to a lack of evidence proving effectiveness of individual ways of musical practicing<sup>5</sup>. In contrast, most of training and education in sports are built upon accumulated evidence through the development of sports science, which has contributed to breaking records over decades<sup>6-8</sup>. Following a similar perspective, musical performance requires reproducible and quantitative knowledge on the effectiveness of music education and training specialized for musicians who are required to perform highly dexterous sensorimotor skills in no way inferior to athletes.

One approach to discover the optimal way of practicing is to compare effects of different ways of practicing on the sensorimotor skills. For example, a previous study examined effects of variation of the temporal structure of piano practicing on neuromuscular control of the sequential finger movements in pianists<sup>9</sup>. While rhythmic variation of successive piano keystrokes improved maximum rate of keystrokes and altered muscular activation patterns in piano playing, there was no change in the rhythmic accuracy of the keystrokes. Non-invasive brain stimulation using the transcranial direct current stimulation also improved fine control of the finger movements in untrained individuals, but not in trained pianists<sup>10</sup>. These results highlight difficulty of improving precision of repetitive finger movements in pianists, although a recent study discovered a rare case of achieving it through a specialized somatosensory training with a haptic device<sup>11</sup>.

Plyometric exercise has been known as one established training in the field of sports, which consists of a quick succession of eccentric and concentric contractions of the targeted muscle.<sup>12</sup> Previous studies investigating this exercise have focused on fast, powerful movements of the lower extremities, such as sprinting<sup>13</sup> and vertical jumping<sup>14</sup>, and have revealed significant reduction of muscular fatigue due to a decrease of the duration of forceful contraction compared to resilience exercises that stretch

the muscle spindles to the same degree<sup>12</sup>. Post-activation performance enhancement (PAPE) has been proposed as a putative physiological mechanism underlying the short-term improvement of the performance due to an increase in rate of force development (RFD) following some physical training such as not only high-intensity resilience exercises but also plyometric training.<sup>15</sup> However, evidence for the effectiveness of the plyometric exercises has been limited primarily to the lower extremity, with only a few studies in the upper extremity such as the shoulder,<sup>16</sup> but none in the forearm and hand that are different from the lower extremity in terms of neurophysiological and biomechanical architectures. Also, it has not been known whether the plyometric exercises enhance fine motor control of trained individuals such as musicians.

The goal of the present study is to address effects of plyometric exercises on dexterous finger movements while trained pianists play the piano. To this aim, we assessed the time-varying trajectory of the vertical position of the piano keys, key-depression force, and finger muscular activities before and after the training, based on previous findings of the relationship of pianistic skills with force exertion patterns<sup>17,18</sup> and muscular activities<sup>19</sup>. Since it has been pointed out that changes in performance due to PAPE is partially supported by elevation of muscle temperature<sup>20</sup>, and since its time course has been shown to accompany changes in motor skill<sup>21,22</sup>, muscle temperature was measured throughout the course of time before, during, and after the training in this study. While several studies have investigated physiological mechanisms of piano performance and practicing<sup>19,23,24</sup>, there has been no study assessing the skin and muscular temperature of the finger muscles during piano practicing. The present research will therefore provide performers and instructors with a basis for the application of evidence-based practice methods and training regimes, which are particularly important for the prevention of the development of overuse syndromes and focal dystonia<sup>25</sup>.

## METHODS

### *Participants*

Twenty-six pianists participated in the experiment (Nineteen females; 18-30 yr old). All of them had undergone intensive piano training and formal musical education at music conservatories and/or privately for > 14yr. The pianists were randomly classified into two groups undergoing different training tasks (see details in *Experimental Tasks*). In accord with the Declaration of Helsinki, the experimental procedures were explained to all participants. All procedures were approved by the ethics committee at Sophia University.

### ***Experimental Setup***

A digital piano with a real key action (KAWAI, VPC-1) was used in the experiment to collect data representing the timing, pitch, and velocity of the individual key presses and releases (i.e. MIDI information) with a custom-made LabVIEW (National Instruments) program. The instrumental sound was elicited via a headphone attached on the participant's ears. The surface electromyography (EMG) system with two sets of wirelessly connected electrodes (Trigno Quattro sensors, Delsys Inc.) was connected to a laptop through an analog-to-digital board (NI USB-6363; National Instruments). Each electrode was placed on the muscle belly of the extensor digitorum communis (EDC) and flexor digitorum superficialis (FDS) of the right hand. The EMG signals were amplified, band-pass filtered (10-500Hz), and sampled at 1kHz using LabVIEW. As with EMG, a custom-made force sensor connected to an analog-to-digital convertor was used to measure the force when each finger was pressing down the sensor. A high resolution position sensor system was mounted on the bottom of the key-bed<sup>26</sup>, and the vertical position of the keys was recorded by 1kHz in synchronization with MIDI and EMG. Both muscle temperature of the EDC and nearby skin temperature were measured at each time point throughout the experiment (see Fig.6) with a time resolution of 500 ms using the 3M™ Bair Hugger™ Temperature Monitoring System. Participants were instructed to avoid having any exercises prior to the experiment.

### ***Experimental Tasks***

The experiment consisted of three successive sessions within a single day: pre-test, training, and post-test. In addition, the post-test session consisted of three trials with a break in between; 0min, 10min, and 25min after the training. In the pre-test and post-test sessions, participants were asked to perform two tasks: piano test and finger force production test. At the beginning of the experiment, the isometric maximal voluntary contraction (MVC) was asked to be performed at the EDC and FDS to calculate %MVC during the task performance.

In the piano test, participants played the melody designated in a test score (see Fig. 2A right) with the piano by the right hand, while their elbow was put on a table to minimize motions of the other body portions (i.e. forearm only). Furthermore, they were instructed so that the fingers could be kept on the surface of the keyboard from the beginning of the keystroke as much as possible and that the wrist could be immobilized without any rotational movements. The participants were asked to play with maintaining the tempo of 100 BPM (i.e. with the inter-tone duration of 100 msec due to sextuplet) as accurately as possible during the task performance with keeping the loudness as consistent as possible. The tempo was provided with a metronome only before each performance was initiated.

In the finger force production test, the elbow and wrist were immobilized on a table, and only the fingers were used to press the force sensor in a manner displayed on the musical score (see Fig. 4A). As in the piano test, their fingertips were always kept contact with the force sensors. Then the participants were asked to press as strongly and quickly as possible, along with the tempo provided by the metronome.

In the training session, participants were asked to perform the training task with the right hand in an instructed manner that differed between the groups. Participants in the main group were instructed to perform a plyometric-like exercise with the piano 40 times in a manner displayed on the score (see the score in Fig.1, and supplemental video), which was characterized as follows: 1) one continuous cycle of swinging the hand down from 100mm above the keyboard and returning to the original position, 2) two strong strikes in succession as a unit, the first with the downward elbow motion and the second with the wrist flexion (i.e. snapping), 3) being aware of relaxing the muscles

except at the moment of each enunciation, 4) making the interval between two successive strikes as short as possible. By contrast, participants in the control group repeated the same exercise as the aforementioned piano test 40 times, so that the total duration of the training session could be the same between the main and control groups.

### ***Data analysis***

*Movement variables.* The MIDI information obtained from the keyboard was used as variables for evaluating the keystroke performance. The Coefficient of Variation (CV) of the inter-onset interval of two successive keystrokes was used as a variable representing stability of the tempo, whereas the CV of the keystroke velocity was used as an index representing the loudness stability.

Data of the finger pressure and key motions were cut for each press/keystroke as epochs according to a threshold (three times of the standard deviation of the signals prior to the task performance), which was used for time normalization of the epochs. These data were averaged across the epochs for smoothing, and the diff function in MATLAB (Mathworks Inc.) was used to compute the first and second derivatives of the vertical position of the key. The maximum value of each waveform was used for the subsequent analyses.

*EMG preprocessing.* The EMG data were bandpass filtered at 10-250 Hz to remove artificial high-frequency noise and movement artifacts. The same time-index was used for time normalization of the EMG signals to temporally align each epoch with the time normalized force and key motion.

### ***Statistics***

A two-way mixed-design ANOVA (independent variables: Group and Condition) or three-way mixed-design ANOVA (independent variables: Group, Condition, and Finger) was run as needed. If Mauchly's sphericity test was necessary, the Greenhouse-Geisser correction was performed. Post-hoc was performed only in the case of significance with correction for multiple comparisons ( $p < 0.05$ ).

## **RESULTS**

### ***Training effects on variability of the inter-keystroke intervals and keypress velocity***

Figure 2 illustrates the group means of the coefficient of variation of the inter-keystroke interval (Fig.2B) and that of the keypress velocity (Fig.2C) before and after the training in the main and control groups when playing the designated task (Fig.2A). For the rhythmic variability of the keystrokes, a two-way mixed-design ANOVA with group and condition yielded both interaction effect ( $F(3,72)=3.967$ ,  $p=1.23 \times 10^{-4}$ ,  $\eta^2=0.053$ ) and main effect of condition ( $F(3,72)=14.51$ ,  $p=1.73 \times 10^{-7}$ ,  $\eta^2=0.170$ ), but no main effect of group ( $F(1,24)=5.19$ ,  $p=0.48$ ,  $\eta^2=0.014$ ). Post-hoc comparison showed group differences only after the training session. For the inter-stroke variability of the keypress velocity, both the interaction effect between group and condition ( $F(3,72)=8.736$ ,  $p=5.13 \times 10^{-5}$ ,  $\eta^2=0.048$ ) and main effect of condition ( $F(3,72)=11.58$ ,  $p=2.80 \times 10^{-6}$ ,  $\eta^2=0.062$ ) were significant, whereas there was no main effect for group ( $F(1,24)=3.029$ ,  $p=0.095$ ,  $\eta^2=0.098$ ).

### ***Training effects on the piano key-descending velocity and acceleration***

Figure 3 shows the group means of the maximum descending velocity (Fig.3B) and acceleration (Fig.3C) of the key-motion before and after training in the main and control groups at the designated piano task (Fig.2A). For the maximum velocity, a two-way mixed-design ANOVA with group and condition revealed a significant interaction effect as well as main effects of both group and condition for all keys (see Table 1). Post-hoc comparison showed group differences only after the training session for all keys. For the maximum acceleration, the interaction effects were evident at all of the four keys to be struck, whereas the main effects of the group at the key1 and key3 and the main effects of condition at all keys were significant (see Table 2). Post-hoc comparison yielded group differences only after the training session for all keys except for the key4. We also found a negative correlation of the differential value of the maximum acceleration of the key descending motion between the pretest and posttest in the main group, both with the variability of the inter-keystroke intervals ( $r=-0.45$ ) and that of the keypress velocity ( $r=-0.55$ ), respectively.



**Table 1.** Results of two-way mixed-design ANOVA for the maximum velocity and acceleration of the key-motion

| Variable           | Fixed Effect |                             |              |              |                              |              |                   |                              |              |
|--------------------|--------------|-----------------------------|--------------|--------------|------------------------------|--------------|-------------------|------------------------------|--------------|
|                    | Group        |                             |              | Condition    |                              |              | Group × Condition |                              |              |
|                    | <i>F</i>     | <i>P</i>                    | $\eta^2$     | <i>F</i>     | <i>P</i>                     | $\eta^2$     | <i>F</i>          | <i>P</i>                     | $\eta^2$     |
| Key motion         |              |                             |              |              |                              |              |                   |                              |              |
| Key 1 max-velocity | <b>4.732</b> | <b>3.97×10<sup>-2</sup></b> | <b>0.156</b> | <b>14.24</b> | <b>1.36×10<sup>-6</sup></b>  | <b>0.036</b> | <b>19.70</b>      | <b>2.36×10<sup>-8</sup></b>  | <b>0.049</b> |
| max-acceleration   | <b>23.97</b> | <b>5.41×10<sup>-5</sup></b> | <b>0.472</b> | <b>17.76</b> | <b>9.96×10<sup>-9</sup></b>  | <b>0.070</b> | <b>12.25</b>      | <b>1.45×10<sup>-6</sup></b>  | <b>0.049</b> |
| Key 2 max-velocity | <b>9.632</b> | <b>4.85×10<sup>-3</sup></b> | <b>0.267</b> | <b>16.85</b> | <b>2.16×10<sup>-8</sup></b>  | <b>0.058</b> | <b>19.73</b>      | <b>1.94×10<sup>-9</sup></b>  | <b>0.068</b> |
| max-acceleration   | 2.198        | 1.51×10 <sup>-1</sup>       | 0.071        | <b>13.78</b> | <b>3.42×10<sup>-7</sup></b>  | <b>0.068</b> | <b>23.24</b>      | <b>1.25×10<sup>-10</sup></b> | <b>0.109</b> |
| Key 3 max-velocity | <b>7.152</b> | <b>1.33×10<sup>-2</sup></b> | <b>0.218</b> | <b>26.27</b> | <b>1.38×10<sup>-11</sup></b> | <b>0.062</b> | <b>21.90</b>      | <b>3.49×10<sup>-10</sup></b> | <b>0.052</b> |
| max-acceleration   | <b>6.825</b> | <b>1.53×10<sup>-2</sup></b> | <b>0.201</b> | <b>13.02</b> | <b>6.96×10<sup>-7</sup></b>  | <b>0.037</b> | <b>14.46</b>      | <b>1.82×10<sup>-7</sup></b>  | <b>0.041</b> |
| Key 4 max-velocity | <b>14.17</b> | <b>9.54×10<sup>-4</sup></b> | <b>0.356</b> | <b>8.113</b> | <b>9.99×10<sup>-5</sup></b>  | <b>0.021</b> | <b>15.04</b>      | <b>1.07×10<sup>-7</sup></b>  | <b>0.038</b> |
| max-acceleration   | 3.242        | 8.43×10 <sup>-2</sup>       | 0.109        | <b>10.71</b> | <b>6.68×10<sup>-6</sup></b>  | <b>0.041</b> | <b>8.375</b>      | <b>7.54×10<sup>-5</sup></b>  | <b>0.032</b> |

### *Training effects on the maximum finger force exertion*

In order to identify factors associated with the aforementioned results, we investigated effects of training on RFD during the finger force exertion in the finger force production test. Figure 4 shows the group means of the maximum finger force exerted by each of the four fingers (Fig.4C) before and after the training in the main and control groups when performing the designated finger force production task (Fig.4A). A three-way mixed-design ANOVA with group, condition, and finger was performed for the maximum exerted force (see Table 2). There was no second-order interaction, whereas significant first-order interactions were found for both Finger × Condition and Group × Condition, but not for Group × Finger. The main effects of all three factors were also significant. For each finger, post-hoc comparison was conducted for Group × Condition, and overall groupwise differences were found for the fingers 2, 4, and 5, but not for the fingers 1 and 3. For the time to which the exerted finger force reached its peak value, ANOVA revealed the main effect only of the finger, but none of the interactions and the other main effects were significant (Table 2).

**Table 2.** Results of two-way mixed-design ANOVA for each of the finger pressure and activations of the EDC (extensor) and FDS (flexor) muscles in the finger force development task

| Variable                                   | Fixed Effect |                       |          |           |                       |          |        |                       |          |                   |                       |          |                |                       |          |                    |                       |          |                            |                       |          |
|--------------------------------------------|--------------|-----------------------|----------|-----------|-----------------------|----------|--------|-----------------------|----------|-------------------|-----------------------|----------|----------------|-----------------------|----------|--------------------|-----------------------|----------|----------------------------|-----------------------|----------|
|                                            | Group        |                       |          | Condition |                       |          | Finger |                       |          | Group × Condition |                       |          | Group × Finger |                       |          | Condition × Finger |                       |          | Group × Condition × Finger |                       |          |
|                                            | F            | P                     | $\eta^2$ | F         | P                     | $\eta^2$ | F      | P                     | $\eta^2$ | F                 | P                     | $\eta^2$ | F              | P                     | $\eta^2$ | F                  | P                     | $\eta^2$ | F                          | P                     | $\eta^2$ |
| <b>Finger pressure</b>                     |              |                       |          |           |                       |          |        |                       |          |                   |                       |          |                |                       |          |                    |                       |          |                            |                       |          |
| Max                                        | 5.660        | 2.56×10 <sup>-2</sup> | 0.139    | 25.39     | 4.73×10 <sup>-9</sup> | 0.035    | 13.39  | 7.75×10 <sup>-8</sup> | 0.109    | 18.91             | 2.10×10 <sup>-7</sup> | 0.026    | 1.10           | 3.57×10 <sup>-1</sup> | 0.010    | 7.42               | 1.68×10 <sup>-9</sup> | 0.019    | 1.850                      | 6.01×10 <sup>-2</sup> | 0.005    |
| Time to peak                               | 0.297        | 5.91×10 <sup>-1</sup> | 0.006    | 0.272     | 0.781                 | 0.002    | 3.702  | 0.0454                | 0.016    | 0.716             | 0.505                 | 0.006    | 0.356          | 0.645                 | 0.002    | 0.988              | 0.386                 | 0.007    | 1.464                      | 0.240                 | 0.011    |
| <b>EMG (finger force development task)</b> |              |                       |          |           |                       |          |        |                       |          |                   |                       |          |                |                       |          |                    |                       |          |                            |                       |          |
| Max (EDC)                                  | 0.999        | 1.42×10 <sup>-1</sup> | 0.012    | 0.737     | 2.22×10 <sup>-1</sup> | 0.006    | 0.626  | 2.70×10 <sup>-1</sup> | 0.015    | 0.415             | 7.43×10 <sup>-1</sup> | 0.001    | 1.388          | 2.44×10 <sup>-1</sup> | 0.002    | 0.711              | 7.40×10 <sup>-1</sup> | 0.002    | 0.999                      | 4.50×10 <sup>-1</sup> | 0.003    |
| Max (FDS)                                  | 2.446        | 1.31×10 <sup>-1</sup> | 0.063    | 0.841     | 2.79×10 <sup>-1</sup> | 0.004    | 0.948  | 2.69×10 <sup>-1</sup> | 0.007    | 1.770             | 8.77×10 <sup>-2</sup> | 0.003    | 0.974          | 4.25×10 <sup>-1</sup> | 0.009    | 0.677              | 4.43×10 <sup>-1</sup> | 0.002    | 1.050                      | 3.97×10 <sup>-1</sup> | 0.005    |
| Interval of peaks                          | 1.143        | 2.96×10 <sup>-1</sup> | 0.018    | 0.124     | 9.45×10 <sup>-1</sup> | 0.0001   | 0.774  | 5.12×10 <sup>-1</sup> | 0.036    | 0.755             | 5.23×10 <sup>-1</sup> | 0.001    | 2.221          | 9.26×10 <sup>-1</sup> | 0.004    | 1.481              | 1.31×10 <sup>-1</sup> | 0.007    | 2.883                      | 9.91×10 <sup>-1</sup> | 0.001    |

### *Finger muscular activities during the finger force production test*

Figure 5 illustrates the group means of the maximum activities of the EDC and FDS muscles (Fig.5C) and the time-varying waveforms of these muscular activities (Fig.5B) along with the force exerted by the index finger (Fig.5A) during the finger force production test. For the maximum values, a three-way mixed-design ANOVA with group, condition, and finger showed that neither the interactions nor main effects were significant for each of the EDC and FDS (Table 2). Similarly, for the time interval of the peak activities between the EDC and FDS, a three-way mixed-design ANOVA yielded neither significant interaction nor main effects.

### *Training effects on changes of muscle and skin temperature*

Figure 6 shows the group means of the time-varying muscle temperatures at the extrinsic finger extensor (EDC) (Fig.6A) and the forearm skin temperatures (Fig.6B) throughout the experiment. A two-way mixed-design ANOVA with condition and group was performed for the muscle temperature and found a significant interaction ( $F(13,312) = 3.154$ ,  $p = 4.23 \times 10^{-2}$ ,  $\eta^2=0.032$ ), main effects of group ( $F(1,24) = 5.035$ ,  $p = 3.43 \times 10^{-2}$ ,  $\eta^2 = 0.136$ ) and condition ( $F(13,312) = 53.48$ ,  $p = 6.71 \times 10^{-15}$ ,  $\eta^2 = 0.359$ ). Post-hoc comparisons revealed group differences particularly during the period from the second half of the training to 10 min after the training. A two-way mixed-design ANOVA for the skin temperature similarly showed both a significant interaction ( $F(13,312)=2.602$ ,  $p=1.93 \times 10^{-2}$ ,  $\eta^2 =0.049$ ) and main effect of group ( $F(1,24)=9.968$ ,  $p =4.26 \times 10^{-3}$ ,  $\eta^2 =0.179$ ), but no condition effect ( $F(13,312)=1.364$ ,  $p=2.32 \times 10^{-1}$ ,  $\eta^2=0.026$ ).

Post-hoc comparisons showed significant group differences during the period similar to that of the muscle temperature.

## **DISCUSSION**

The present study found that the plyometric training targeting the extrinsic finger flexor muscle was effective as exemplified by a decrease of the variability of both keystroke timing and velocity when performing pianistic tasks that require loud and fast tone production. On the other hand, such a significant effect was not observed following the training with repetitive piano keystrokes that did not involve the plyometric-like muscular contraction (i.e. a control group). The contrasting group difference indicates that the plyometric exercises used in this study were effective for enhancing precision of the finger movements in piano performance of loud and fast passages, which has been difficult in previous studies. Interestingly, the finger muscular activities did not change following the plyometric exercise, whereas the finger muscular but not skin temperature was elevated as the plyometric exercise was being performed. This suggests physiological changes at the finger muscles by the exercise. Together, these results indicate that the plyometric exercise has potentials of further improving well-trained performance skills of pianists.

To evaluate the training effect on the finger motor functions, we assessed RFD in the isometric finger force production for flexion. Specifically following the plyometric-like piano training, RFD was increased for each of the four fingers that underwent the training. A lack of any training effect at the thumb that did not perform the plyometric training and at all fingers that underwent the conventional repetitive practicing supports the idea that the enhanced ability of the finger force production resulted from this training. Similarly, the training effect was also evident for the maximum acceleration of the piano key-depression, which was correlated with improvement of precision of timing and velocity in the piano keystrokes. One possible explanation for the enhanced piano performance is a negative relationship between the muscular strength and variability of the force production<sup>27</sup>. It is therefore plausible that the strengthening effect of the plyometric exercise on the finger muscles may aid in

reducing signal-dependent noise in the motor commands issued into the muscles. Interestingly, the muscular activation was not augmented through the training, even though the force production was increased. This indicates that the target force can be produced with reduced finger muscular activities of the finger, implicating improvement of physiological efficiency. This can play a role in preventing muscular fatigue and/or development of overuse syndromes through piano practicing, in addition to enhancement of timing and force precision in piano performance.

As one putative physiological mechanism behind the effect of the plyometric training on the force production ability, we found an elevation of the finger muscular temperature but not of the skin temperature specifically following this training. Previous studies demonstrated that an increase in muscle temperature is associated with an increase in both RFD and shortening velocity of the skeletal muscles<sup>28-30</sup>, and increased blood influx to the muscle and its concomitant increase in Ca<sup>2+</sup> sensitivity have been pointed out as its underlying mechanism<sup>12,31-33</sup>. These physiological and chemical adaptation might be induced by the present training, which possibly resulted in an increased sensitivity of the finger muscle contraction to motor commands and thereby enhanced force production without changing the muscular activities.

It has been proposed that plyometric exercise can induce PAPE not only in the lower limb but also in the upper limb at the short force production rather than resilience exercises with high and lasting long force production<sup>12,34</sup>. In the present study, we used the plyometric exercise for the finger muscles, as in other studies<sup>35</sup> advocating PAPE, which demonstrated concomitant changes in the finger muscular temperature along with the training, and eventually an increase in the RFD at the four fingers. This observation suggests that selective application of plyometric exercises to the finger extrinsic muscles induced PAPE, which may underlie the improved motor skills in piano performance.

One limitation to infer the physiological mechanism of the training effect is no assessment of chemical changes in the muscles through training and neuroplastic changes in the primary motor

cortex and spinal cord via non-invasive brain stimulation. In future studies, it is also necessary to record activities of the intrinsic hand muscles and the other extrinsic muscles in order to uncover the entire physiological mechanism of the plyometric training.

## ACKNOWLEDGEMENT

The present study was supported by JST CREST (JPMJCR20D4), JST CREST (JPMJCR17A3), and JSPS Grant-in-Aid for Transformative Research Areas B (20H05713).

## REFERENCES

1. Münte TF, Altenmüller E, Jäncke L. The musician's brain as a model of neuroplasticity. *Nat Rev Neurosci*. 2002 Jun;3(6):473-8. doi: 10.1038/nrn843. PMID: 12042882.
2. Herholz SC, Zatorre RJ. Musical training as a framework for brain plasticity: behavior, function, and structure. *Neuron*. 2012 Nov 8;76(3):486-502. doi: 10.1016/j.neuron.2012.10.011. PMID: 23141061.
3. Wan CY, Schlaug G. Music making as a tool for promoting brain plasticity across the life span. *Neuroscientist*. 2010 Oct;16(5):566-77. doi: 10.1177/1073858410377805. PMID: 20889966; PMCID: PMC2996135.
4. Krampe RT, Ericsson KA. Maintaining excellence: deliberate practice and elite performance in young and older pianists. *J Exp Psychol Gen*. 1996 Dec;125(4):331-59. doi: 10.1037//0096-3445.125.4.331. PMID: 8945787.
5. Furuya, Shinichi. "Individual differences in sensorimotor skills among musicians." *Current opinion in behavioral sciences* 20 (2018): 61-66.
6. Bergmann F, Gray R, Wachsmuth S, Höner O. Perceptual-Motor and Perceptual-Cognitive Skill Acquisition in Soccer: A Systematic Review on the Influence of Practice Design and Coaching Behavior. *Front Psychol*. 2021 Dec 2;12:772201. doi: 10.3389/fpsyg.2021.772201. PMID: 34925173; PMCID: PMC8675907.
7. Nielsen JB, Cohen LG. The Olympic brain. Does corticospinal plasticity play a role in acquisition of skills required for high-performance sports? *J Physiol*. 2008 Jan 1;586(1):65-70. doi: 10.1113/jphysiol.2007.142661. Epub 2007 Aug 23. PMID: 17717010; PMCID: PMC2375560.
8. Vater C, Gray R, Holcombe AO. A critical systematic review of the Neurotracker perceptual-cognitive training tool. *Psychon Bull Rev*. 2021 Oct;28(5):1458-1483. doi: 10.3758/s13423-021-01892-2. Epub 2021 Apr 5. PMID: 33821464; PMCID: PMC8500884.
9. Furuya S, Yokota S. Temporal exploration in sequential movements shapes efficient neuromuscular control. *J Neurophysiol*. 2018 Jul 1;120(1):196-210. doi: 10.1152/jn.00922.2017. Epub 2018 Apr 11. PMID: 29641299.
10. Furuya, Shinichi, et al. "Ceiling effects prevent further improvement of transcranial stimulation in skilled musicians." *Journal of Neuroscience* 34.41 (2014): 13834-13839.

11. Hirano, M., M. Sakurada, and S. Furuya. "Overcoming the ceiling effects of experts' motor expertise through active haptic training." *Science advances* 6.47 (2020): eabd2558.
12. Davies G, Riemann BL, Manske R. CURRENT CONCEPTS OF PLYOMETRIC EXERCISE. *Int J Sports Phys Ther.* 2015 Nov;10(6):760-86. PMID: 26618058; PMCID: PMC4637913.
13. Chelly MS Hermassi S Shephard RJ. Effects of in-season short-term plyometric training program on sprint and jump performance of young male track athletes. *J Strength Cond Res.* 2015;29(8):2128-2136.
14. Ebben WP Vanderzanden T Wurm BJ Petushek EJ. Evaluating plyometric exercises using time to stabilization. *J Strength Cond Res.* 2010;24(2):300-306.
15. Blazevich, Anthony J., and Nicolas Babault. "Post-activation potentiation versus post-activation performance enhancement in humans: historical perspective, underlying mechanisms, and current issues." *Frontiers in physiology* (2019): 1359.
16. Heiderscheit BC McLean KP Davies GJ. The effects of isokinetic vs. plyometric training on the shoulder internal rotators. *J Orthop Sports Phys Ther.* 1996;23(2):125-133.
17. Oku T, Furuya S. Skilful force control in expert pianists. *Exp Brain Res.* 2017 May;235(5):1603-1615. doi: 10.1007/s00221-017-4926-3. Epub 2017 Mar 4. PMID: 28260157.
18. Parlitz D, Peschel T, Altenmüller E. Assessment of dynamic finger forces in pianists: effects of training and expertise. *J Biomech.* 1998 Nov;31(11):1063-7. doi: 10.1016/s0021-9290(98)00113-4. PMID: 9880064.
19. Wings SA, Furuya S, Faber NJ, Flanders M. Patterns of muscle activity for digital coarticulation. *J Neurophysiol.* 2013 Jul;110(1):230-42. doi: 10.1152/jn.00973.2012. Epub 2013 Apr 17. PMID: 23596338; PMCID: PMC3727042.
20. Blazevich, Anthony J., and Nicolas Babault. "Post-activation potentiation versus post-activation performance enhancement in humans: historical perspective, underlying mechanisms, and current issues." *Frontiers in physiology* (2019): 1359.
21. Wilson, Jacob M., et al. "Meta-analysis of postactivation potentiation and power: effects of conditioning activity, volume, gender, rest periods, and training status." *The Journal of Strength & Conditioning Research* 27.3 (2013): 854-859.
22. Aagaard, P., Simonsen, E. B., Trolle, M., Bangsbo, J. & Klausen, K. (1994). Moment and power generation during maximal knee extensions performed at low and high speeds. *European Journal of Applied Physiology* 69, 376–381.
23. Nakahara H, Furuya S, Francis PR, Kinoshita H. Psycho-physiological responses to expressive piano performance. *Int J Psychophysiol.* 2010 Mar;75(3):268-76. doi: 10.1016/j.ijpsycho.2009.12.008. Epub 2009 Dec 16. PMID: 20025907.
24. Kotani S, Furuya S. State anxiety disorganizes finger movements during musical performance. *J Neurophysiol.* 2018 Aug 1;120(2):439-451. doi: 10.1152/jn.00813.2017. Epub 2018 Apr 11. PMID: 29641301.
25. Furuya S, Hanakawa T. The curse of motor expertise: Use-dependent focal dystonia as a manifestation of maladaptive changes in body representation. *Neurosci Res.* 2016 Mar;104:112-9. doi: 10.1016/j.neures.2015.12.001. Epub 2015 Dec 12. PMID: 26689332.
26. Takanori Oku, Shinichi Furuya Noncontact and high-precision sensing system for piano keys identified

fingerprints of virtuosity bioRxiv 2022.02.17.480858; doi: <https://doi.org/10.1101/2022.02.17.480858>

27. Hamilton AF, Jones KE, Wolpert DM. The scaling of motor noise with muscle strength and motor unit number in humans. *Exp Brain Res.* 2004 Aug;157(4):417-30. doi: 10.1007/s00221-004-1856-7. Epub 2004 Mar 11. PMID: 15014922.
28. Ranatunga, K. W. (1982). Temperature-dependence of shortening velocity and rate of isometric tension development in rat skeletal muscle. *J. Physiol.* 329, 465–483. doi: 10.1113/jphysiol.1982.sp014314
29. Stein, R. B., Gordon, T., and Shriver, J. (1982). Temperature dependence of mammalian muscle contractions and ATPase activities. *Biophys. J.* 40, 97–107. doi: 10.1016/S0006-3495(82)84464-0
30. Elmubarak, M. H., and Ranatunga, K. W. (1984). Temperature sensitivity of tension development in a fast-twitch muscle of the rat. *Muscle Nerve* 7, 298–303. doi: 10.1002/mus.880070408
31. Mansson, A. (1989). Changes in force and stiffness during stretch of skeletal muscle fibers, effects of hypertonicity. *Biophys. J.* 56, 429–433. doi: 10.1016/S0006-3495(89)82689-X
32. Sugi, H., Abe, T., Kobayashi, T., Chaen, S., Ohnuki, Y., Saeki, Y., et al. (2013). Enhancement of force generated by individual myosin heads in skinned rabbit psoas muscle fibers at low ionic strength. *PLoS One* 8:e63658. doi: 10.1371/journal.pone.0063658
33. Sugi, H., Chaen, S., Akimoto, T., Minoda, H., Miyakawa, T., Miyauchi, Y., et al. (2015). Electron microscopic recording of myosin head power stroke in hydrated myosin filaments. *Sci. Rep.* 5:15700. doi: 10.1038/srep15700
34. Ulrich, Gert, and Mario Parstorfer. "Effects of plyometric versus concentric and eccentric conditioning contractions on upper-body postactivation potentiation." *International journal of sports physiology and performance* 12.6 (2017): 736-741
35. Gonzalez-Alonso, J., Quistorff, B., Krstrup, P., Bangsbo, J., and Saltin, B. (2000). Heat production in human skeletal muscle at the onset of intense dynamic exercise. *J. Physiol.* 524, 603–615. doi: 10.1111/j.1469-7793.2000.00603.x

## Figure Legends

**Figure 1.** A musical score representing the training task (top panel) and a schematic drawing of the keystroke movements corresponding to the repetitive keystrokes used by the main group with the plyometric training (middle panel) and control group who underwent the same number of keystrokes as the main group (bottom panel). The number on the score represents the fingering (2, 3, 4, and 5 corresponds the index, middle, ring, and little finger, respectively).

**Figure 2.** A: A schematic illustration of the temporal information of the individual keystrokes representing a musical score representing the test task. B and C: Box plots of the group means of the coefficients of variance (CV) of the timing (MIDI tempo) and velocity (MIDI velocity) of the keypresses before and after the training session (i.e. condition in the x-axis) in the main (red box) and control (blue box) groups. \*:  $p < 0.05$ .

**Figure 3.** A: Representative examples of the time-varying trajectories of the vertical position of the piano key (left) and their derivatives (right) at the pretest (blue) and posttest (i.e. 0 min after the training) (red) of one representative pianist in the main group. B and C: Box plots of the group means of the maximum descending velocity (B) and acceleration (C) of the trajectories of the four keys to be struck (i.e. key1-4) before and after training (x-axis) in the main (red box) and control (blue box) groups. \* $p < 0.05$ , \*\* $p < 0.01$ . D: Scatter plots of the differential values between the pretest and posttest in the maximum keystroke acceleration relative to the CV of the keystroke timing (left panel) and velocity (right panel).

**Figure 4.** A: A score in the finger force production test. B and D: Representative trajectories of the finger pressure and its derivative of one pianist. C: Group means of the maximum pressure exerted by each of the five digits before and after the training task (x-axis; condition) in the main (red) and control (blue) groups. \* $p < 0.05$ , \*\* $p < 0.01$ .

**Figure 5.** A and B: Representative examples of the time-varying trajectory of the finger pressing force (A) and its corresponding muscular activities of the finger extensor and flexor muscles (i.e. EDC and FDS) (B) of one representative pianist in the main group. The x-axis indicates the normalized time so that the period from the initiation to the termination of the force production can be 100 timepoints. C: Box plots of group means of the maximum values of the muscular activities at the EDC and FDS before and after the training session in the main (red) and control (blue) groups. D: Box plots of group means of the interval of the timing of the peak activities between EDC and FDS in the main and control groups. The negative value indicates when the peak FDS activity preceded the peak EDC activity. \* $p < 0.05$ , \*\* $p < 0.01$ .

**Figure 6.** A time-course of the temperature of the finger extensor muscle at the forearm (A) and skin of the forearm (B) throughout a course of the experiment. The x-axis indicates the conditions, each of which is indicated at the right box in the figure. \* $p < 0.05$ , \*\* $p < 0.01$ .



## Main

$\text{♩} = 100$

2 2 3 3 4 4 5 5 5 5 4 4 3 3 2 2 *repeat 10 times*

Piano *ff*

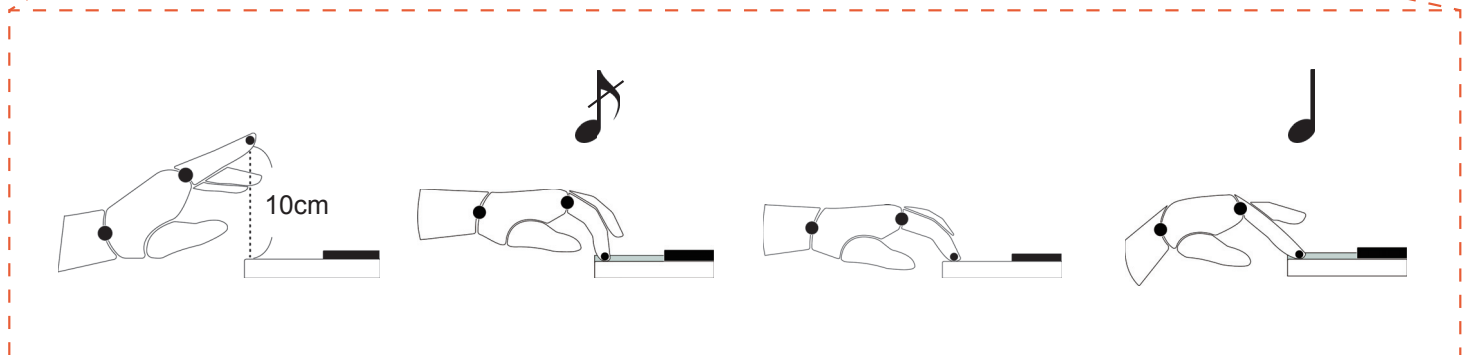

## Control

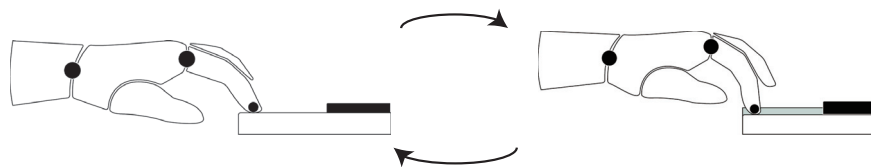

A.

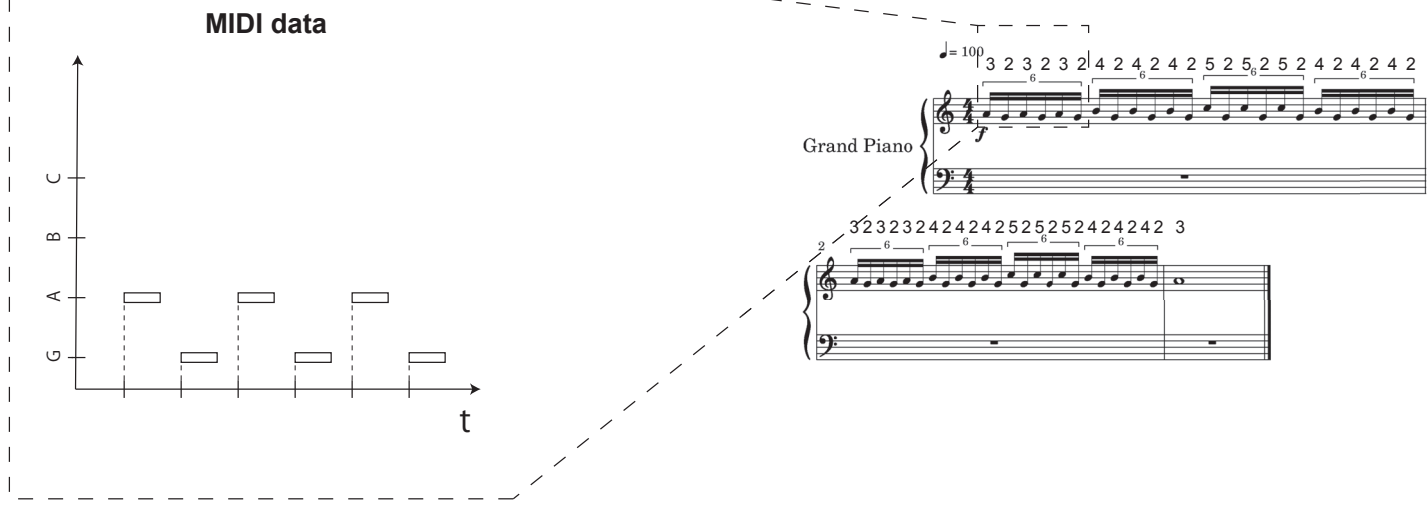

B.

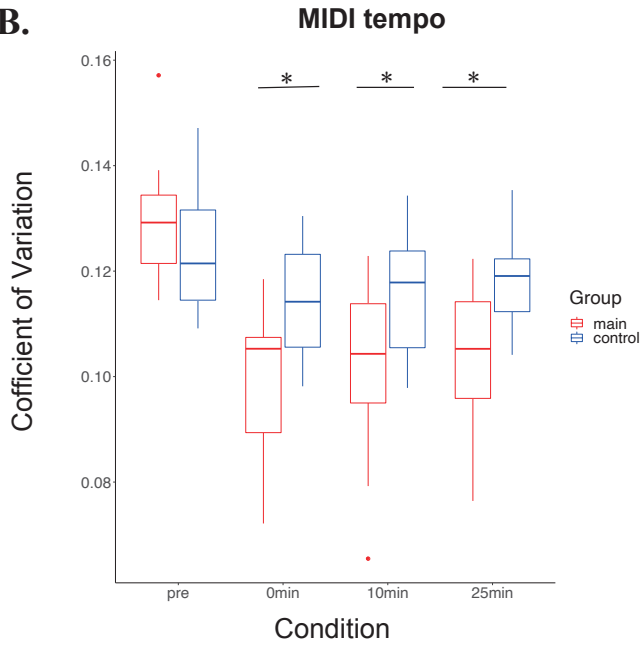

C.

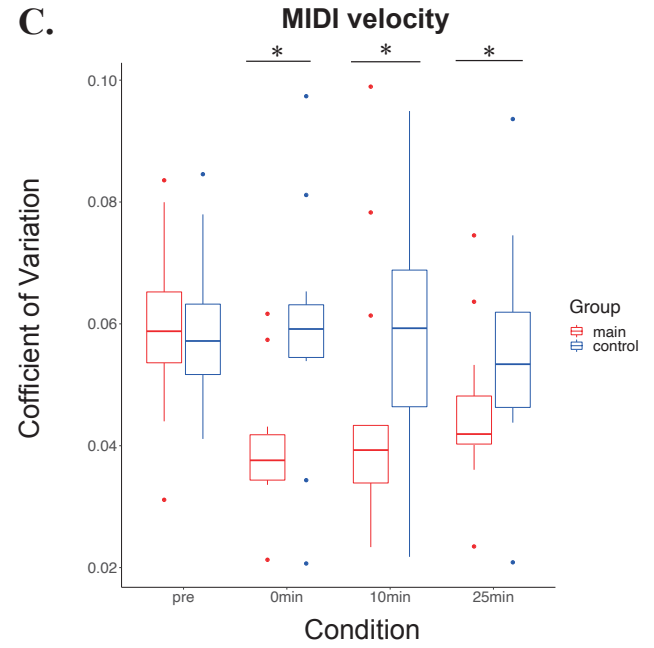

**A.**

1. start
2. key bottom
3. recovery

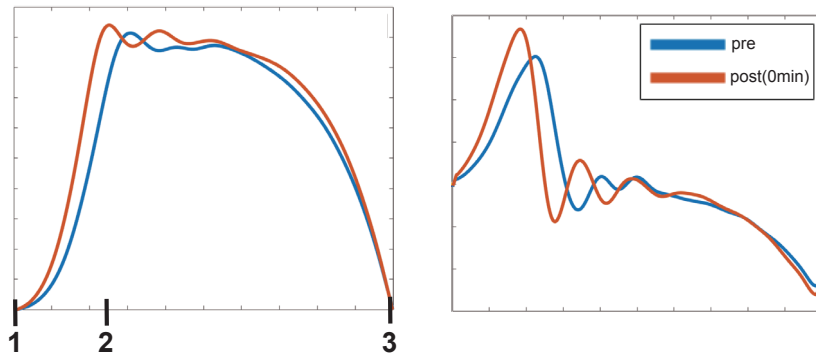

**Group**

- ▣ main
- ▣ control

**B.**

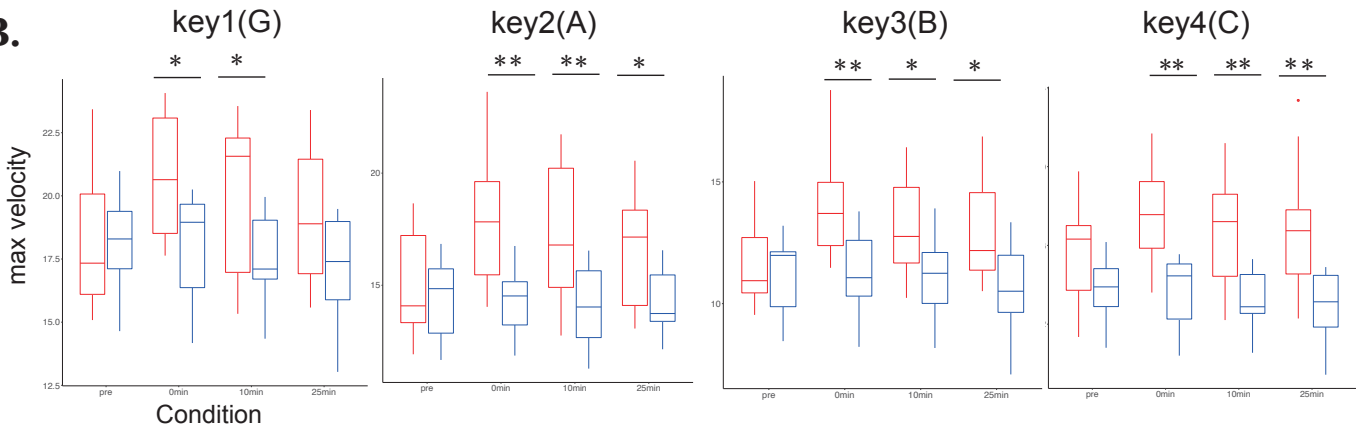

**C.**

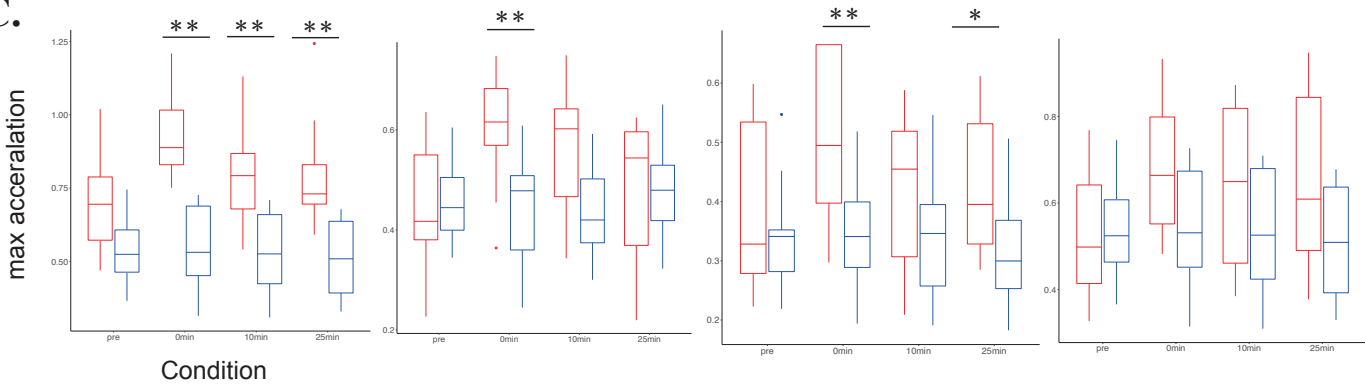

**D.**

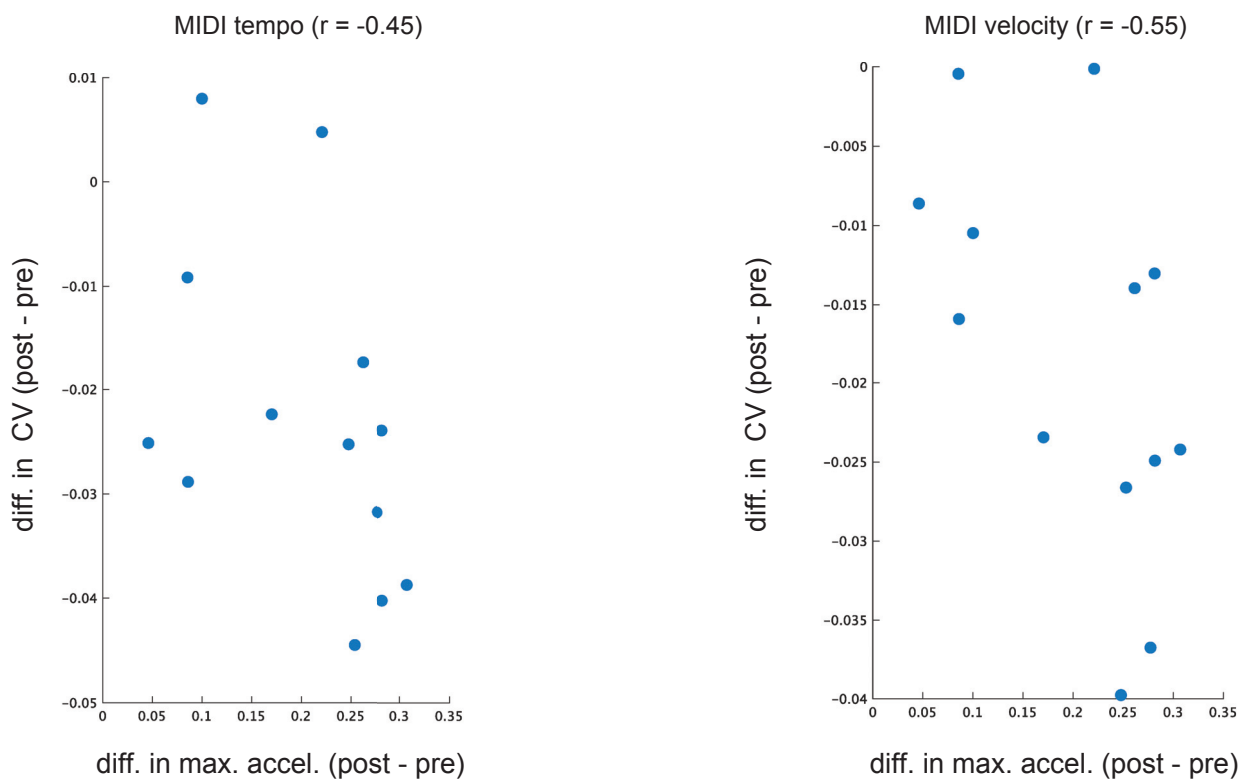

A.

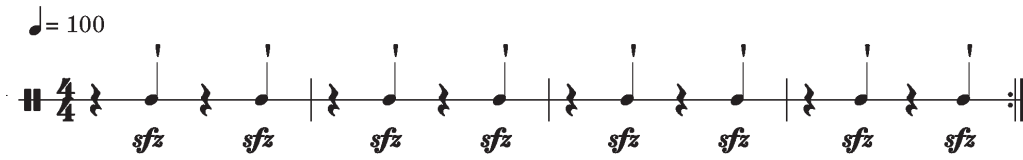

B.

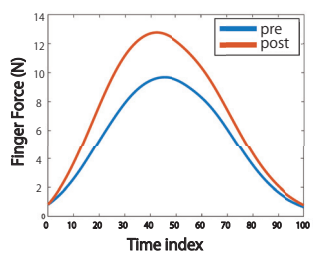

C.

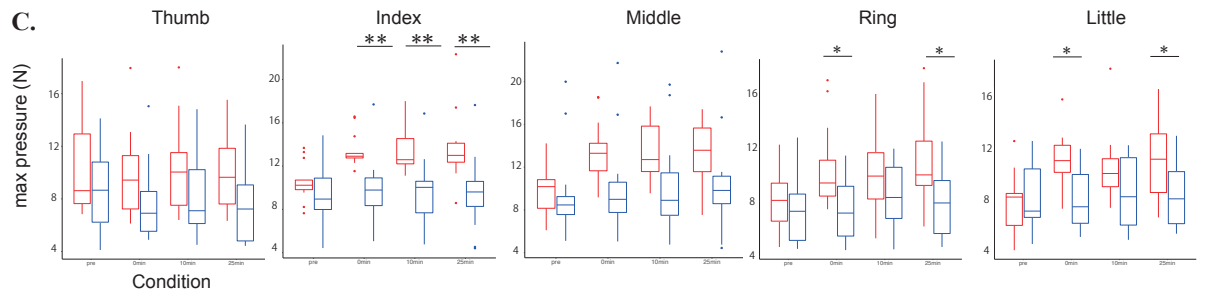

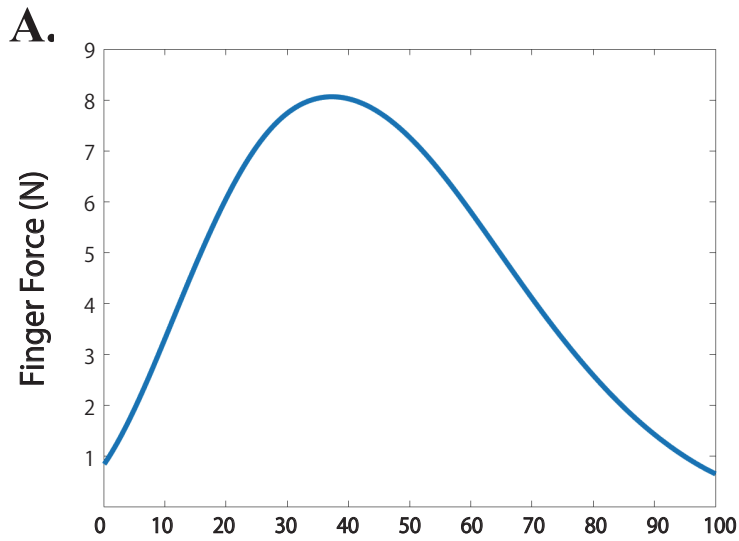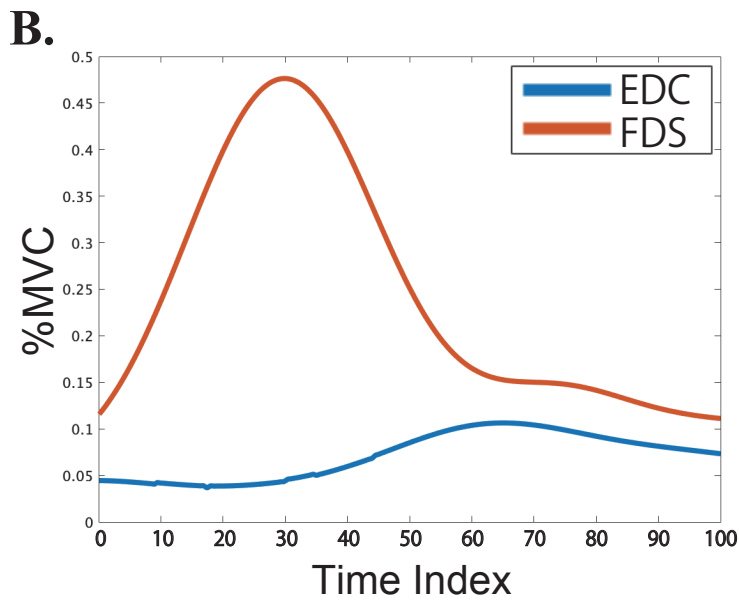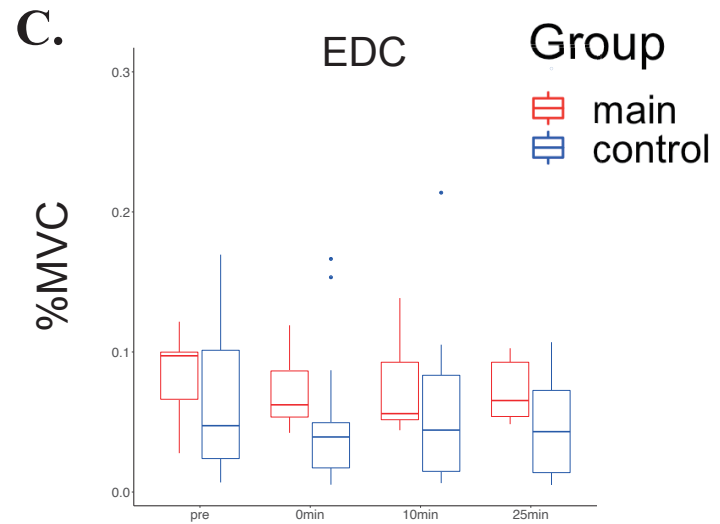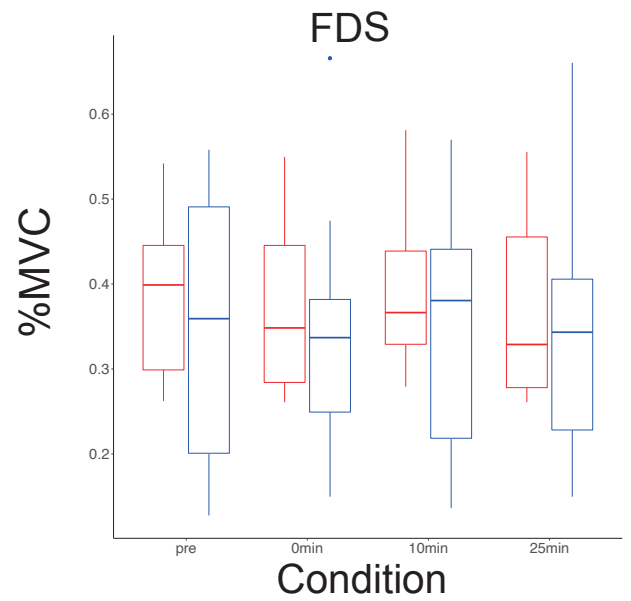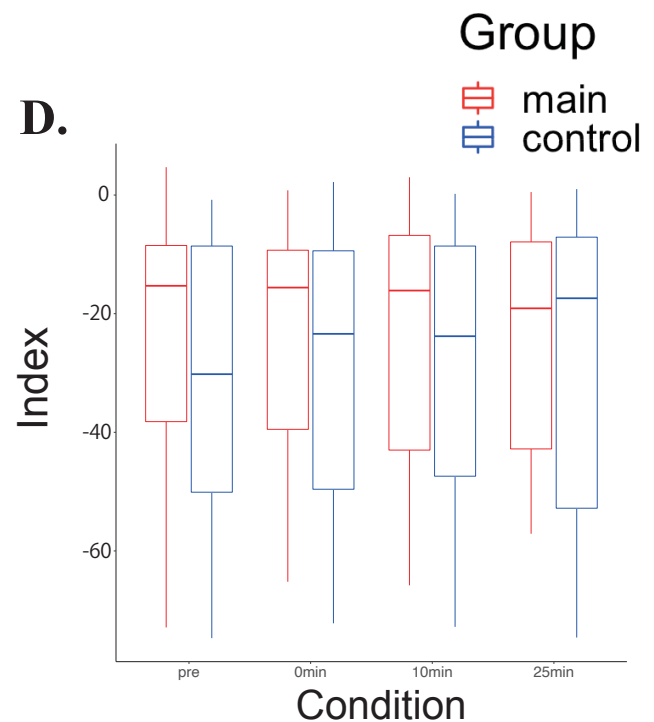

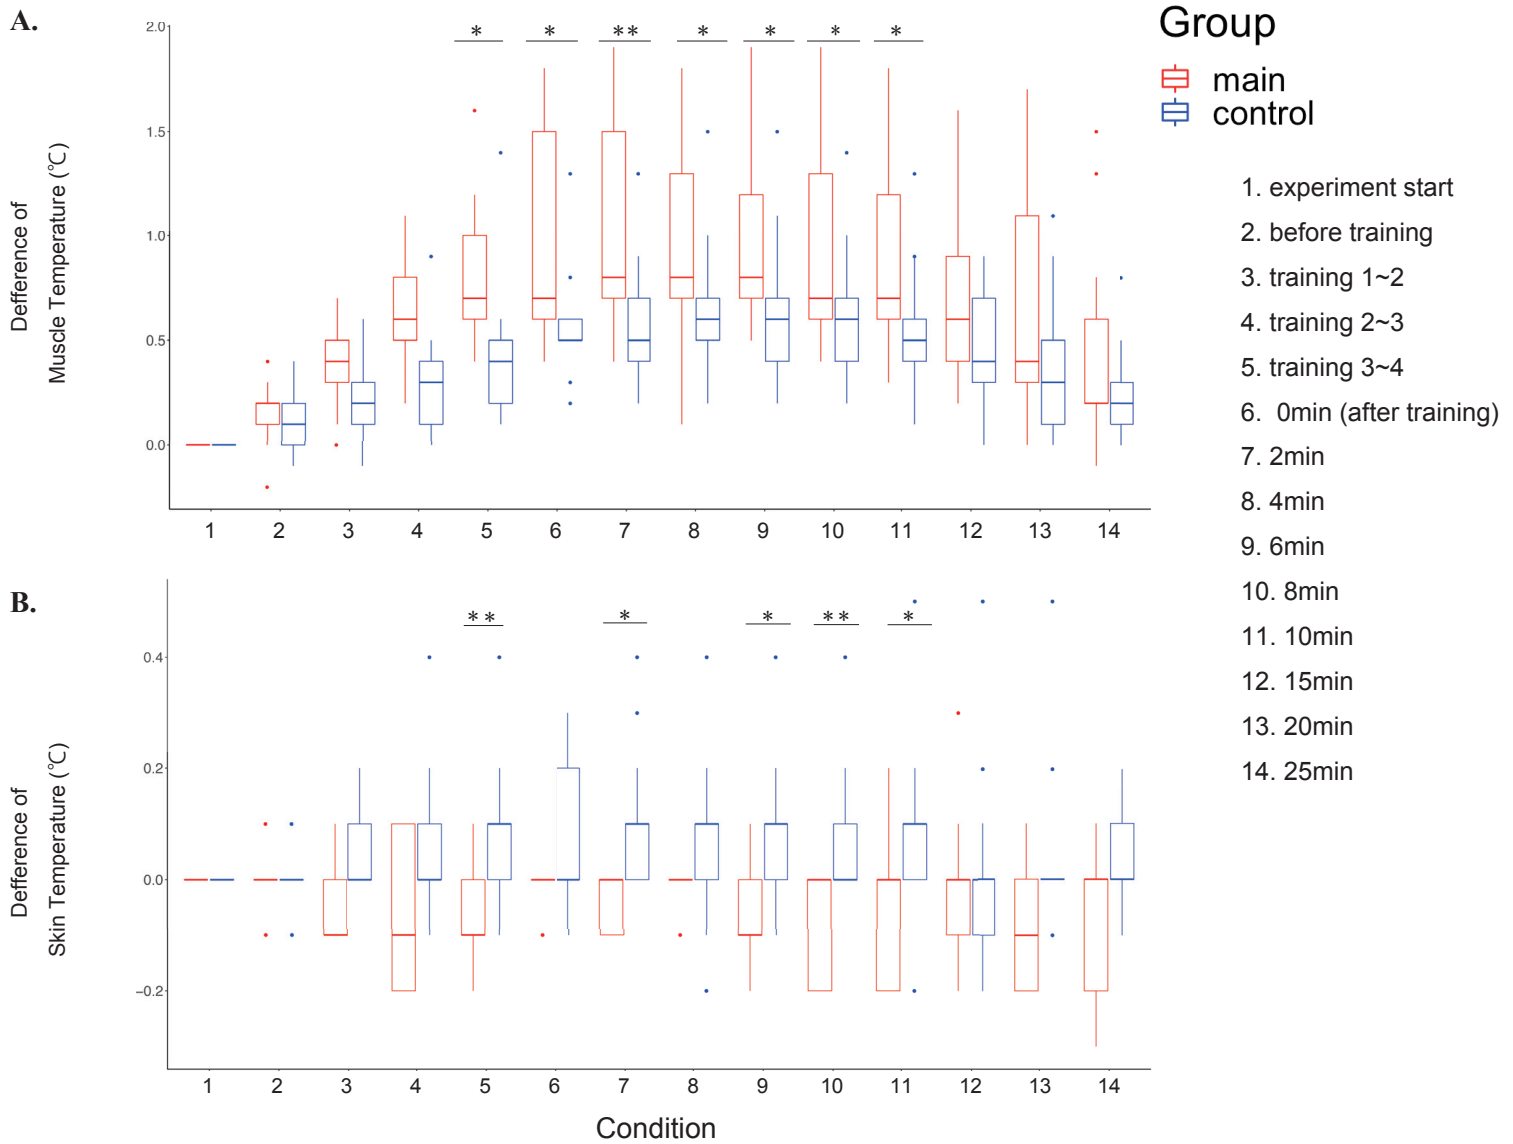

Source: http://biorxiv.org/content/10.1101/2022.05.16.492083v1.full.pdf
